# Supplementary material
Source: PubMed Central journal article supplement (PMC7198359)
Supplement: NIHMS1568962-supplement-4.pdf [file NIHMS1568962-supplement-4.pdf]

# Supplementary Table 1

| Name              | Oligonucleotide sequence                                                              |
|-------------------|---------------------------------------------------------------------------------------|
| DSbl_001          | TTTTTTTAAGCAGTGGTATCAACGCAGAGTACACGTACGTACGTANNNNNNNNNTTTTTTTTTTTTTTTTTT<br>TTTTTTTTT |
| DSbl_002          | TTTTTTTAAGCAGTGGTATCAACGCAGAGTACCGTACGTACGTANNNNNNNNNTTTTTTTTTTTTTTTTTT<br>TTTTTTTTT  |
| DSbl_003          | TTTTTTTAAGCAGTGGTATCAACGCAGAGTACGTACGTACGTACNNNNNNNNNTTTTTTTTTTTTTTTTTT<br>TTTTTTTTT  |
| DSbl_004          | TTTTTTTAAGCAGTGGTATCAACGCAGAGTACTACGTACGTACGNNNNNNNNNTTTTTTTTTTTTTTTTTT<br>TTTTTTTTT  |
| DSbl_005          | TTTTTTTAAGCAGTGGTATCAACGCAGAGTACACGTACGTACGTANNNNNNNNNTTTTTTTTTTTTTTTTTT<br>TTTTTTTTT |
| DSbl_006          | TTTTTTTAAGCAGTGGTATCAACGCAGAGTACCGTAGTACGTACNNNNNNNNNTTTTTTTTTTTTTTTTTT<br>TTTTTTTTT  |
| DSbl_007          | TTTTTTTAAGCAGTGGTATCAACGCAGAGTACGTACTACGTACGNNNNNNNNNTTTTTTTTTTTTTTTTTT<br>TTTTTTTTT  |
| DSbl_008          | TTTTTTTAAGCAGTGGTATCAACGCAGAGTACTACGACGTACGTNNNNNNNNNTTTTTTTTTTTTTTTTTT<br>TTTTTTTTT  |
| DSbl_009          | TTTTTTTAAGCAGTGGTATCAACGCAGAGTACACGTGTACGTACNNNNNNNNNTTTTTTTTTTTTTTTTTT<br>TTTTTTTTT  |
| DSbl_010          | TTTTTTTAAGCAGTGGTATCAACGCAGAGTACCGTATACGTACGNNNNNNNNNTTTTTTTTTTTTTTTTTT<br>TTTTTTTTT  |
| DSbl_011          | TTTTTTTAAGCAGTGGTATCAACGCAGAGTACGTACACGTACGTNNNNNNNNNTTTTTTTTTTTTTTTTTT<br>TTTTTTTTT  |
| DSbl_012          | TTTTTTTAAGCAGTGGTATCAACGCAGAGTACTACGCGTACGTANNNNNNNNNTTTTTTTTTTTTTTTTTT<br>TTTTTTTTT  |
| TSO               | AAGCAGTGGTATCAACGCAGAGTGAATrGrGrG                                                     |
| SMART PCR primer  | AAGCAGTGGTATCAACGCAGAGT                                                               |
| P5 SMART primer   | AATGATACGGCGACCACCGAGATCTACACGCCTGTCCGCGGAAGCAGTGGTATCAACGCAGAGT*A*C                  |
| Sequencing read 1 | GCCTGTCCGCGGAAGCAGTGGTATCAACGCAGAGTAC                                                 |

## Supplementary Table 2

| Donor # | Cohort          | Age | Gender | HLA-DQ2  | HLA-DQ8  | Year of Celiac Disease Diagnosis |
|---------|-----------------|-----|--------|----------|----------|----------------------------------|
| 1       | Gluten free     | 50  | Female | NEGATIVE | POSITIVE | 2005                             |
| 2       | Gluten free     | 42  | Male   | POSITIVE | NEGATIVE | 2008                             |
| 3       | Gluten free     | 30  | Male   | POSITIVE | NEGATIVE | 2003                             |
| 4       | Gluten free     | 43  | Female | POSITIVE | NEGATIVE | 2011                             |
| 5       | Gluten free     | 61  | Male   | POSITIVE | NEGATIVE | 2015                             |
| 6       | Gluten free     | 59  | Female | POSITIVE | NEGATIVE | 2014                             |
| 7       | Gluten free     | 71  | Female | POSITIVE | POSITIVE | 2014                             |
| 8       | Gluten free     | 28  | Female | POSITIVE | NEGATIVE | 2016                             |
| 9       | Gluten free     | 54  | Female | POSITIVE | NEGATIVE | 2005                             |
| 10      | Gluten free     | 38  | Female | NEGATIVE | POSITIVE | 2011                             |
| 11      | Non-Gluten Free | 57  | Male   | POSITIVE | NEGATIVE | 2016                             |
| 14      | Non-Gluten Free | 52  | Female | POSITIVE | NEGATIVE | 2006                             |
| 15      | Non-Gluten free | 50  | Female | POSITIVE | NEGATIVE | 2008                             |
| 17      | Non-Gluten Free | 33  | Female | POSITIVE | NEGATIVE | 2012                             |
| 18      | Non-Gluten Free | 34  | Female | POSITIVE | POSITIVE | 2015                             |
| 19      | Non-Gluten Free | 64  | Female | POSITIVE | NEGATIVE | 2004                             |
| 20      | Non-Gluten Free | 59  | Male   | POSITIVE | NEGATIVE | 2014                             |
| 21      | Non-Gluten Free | 44  | Female | POSITIVE | NEGATIVE | 2012                             |
| 22      | Non-Gluten Free | 48  | Female | POSITIVE | NEGATIVE | 2014                             |
| 23      | Healthy         | 60  | Male   | POSITIVE | NEGATIVE | N/A                              |
| 24      | Healthy         | 45  | Female | POSITIVE | NEGATIVE | N/A                              |
| 25      | Healthy         | 61  | Male   | NEGATIVE | NEGATIVE | N/A                              |
| 26      | Healthy         | 56  | Male   | NEGATIVE | POSITIVE | N/A                              |
| 27      | Healthy         | 24  | Male   | NEGATIVE | POSITIVE | N/A                              |
| 28      | Healthy         | 55  | Female | NEGATIVE | NEGATIVE | N/A                              |
| 29      | Healthy         | 47  | Female | POSITIVE | NEGATIVE | N/A                              |
| 30      | Healthy         | 37  | Male   | POSITIVE | NEGATIVE | N/A                              |
| 31      | Healthy         | 47  | Male   | POSITIVE | NEGATIVE | N/A                              |
| 32      | Healthy         | 39  | Male   | POSITIVE | NEGATIVE | N/A                              |
| 33      | Healthy         | 34  | Male   | POSITIVE | NEGATIVE | N/A                              |
| 34      | Healthy         | 33  | Male   | POSITIVE | NEGATIVE | N/A                              |
